# Supplementary material for: Detection of H2S using a novel fluorescent nanoprobe in plasma and tissue samples from ASD patients and model mice
Source: Royal Society of Chemistry journal article supplement (doi:10.1039/d3nj00575e), 2023-01-01
Supplement: d3nj00575e1.pdf [file d3nj00575e1.pdf]

# Detection of H<sub>2</sub>S by a novel fluorescence nanoprobe in plasma and tissue of ASD patients and model mice

Changmei Zhang<sup>1,2</sup>, Feng wang<sup>1</sup>, Zehui Liu<sup>1</sup>, Peiwen Guo<sup>1</sup>, Huirong Liang<sup>1</sup>, Wenru Tian<sup>1</sup>,  
Lingyuan Yang<sup>1</sup>, Yaxin Shi<sup>1</sup>, Mingyang Zou<sup>1</sup>, Lijie Wu<sup>1\*</sup>

1. Department of Children's and Adolescent Health, Public Health College, Harbin Medical University, Harbin, 150086, China

2. Department of Pharmaceutics, Daqing Campus of Harbin Medical University, 1 Xinyang Rd Daqing, 163319, China

\*Corresponding author.

Lijie Wu. E-mail: [wulijiehyd@126.com](mailto:wulijiehyd@126.com)

## 1. Materials

Actone, sodium azide, MgSO<sub>4</sub>, sodium sulfide nonahydrate, methanol were purchased from Innochem. All other used agents were of the highest commercial grade available.

## 2. Methods

### 2.1 Synthesis of H<sub>2</sub>S probe (DNS-Az)

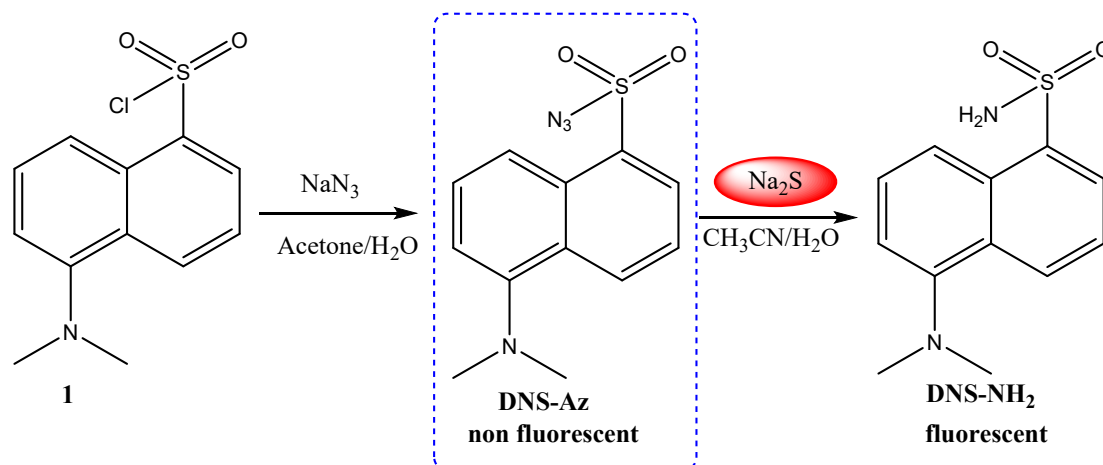

Scheme 1. Synthesis of dansyl azide (DNS-Az) and DNS-NH<sub>2</sub>.

A solution of compound **1** (300 mg, 1.12 mmol) in 4 mL of actone was added dropwise into a stirred solution of sodium azide in 12 mL of a mixed solvent (H<sub>2</sub>O/Actone, 2:1). Then the reaction mixture was stirred at room temperature for 5 h. The mixture was evaporated in vacuum to remove the organic solvent, and extracted by DCM. The combined organic layers was washed with brine and then dried over MgSO<sub>4</sub>. Solvent evaporation gave the crude product, which was purified by flash chromatography to give **DNS-Az** (260 mg, 84.5%) as a light yellow oil. A solution of **DNS-Az** (200 mg, 0.72 mmol) in 20 mL of CH<sub>3</sub>CN was added into a solution of sodium sulfide nonahydrate (518 mg, 2.16 mmol) in 1 mL H<sub>2</sub>O, Then the reaction mixture was stirred at room temperature for 3 h to finally give **DNS-NH<sub>2</sub>** (100 mg, 55.2%) as while solid.

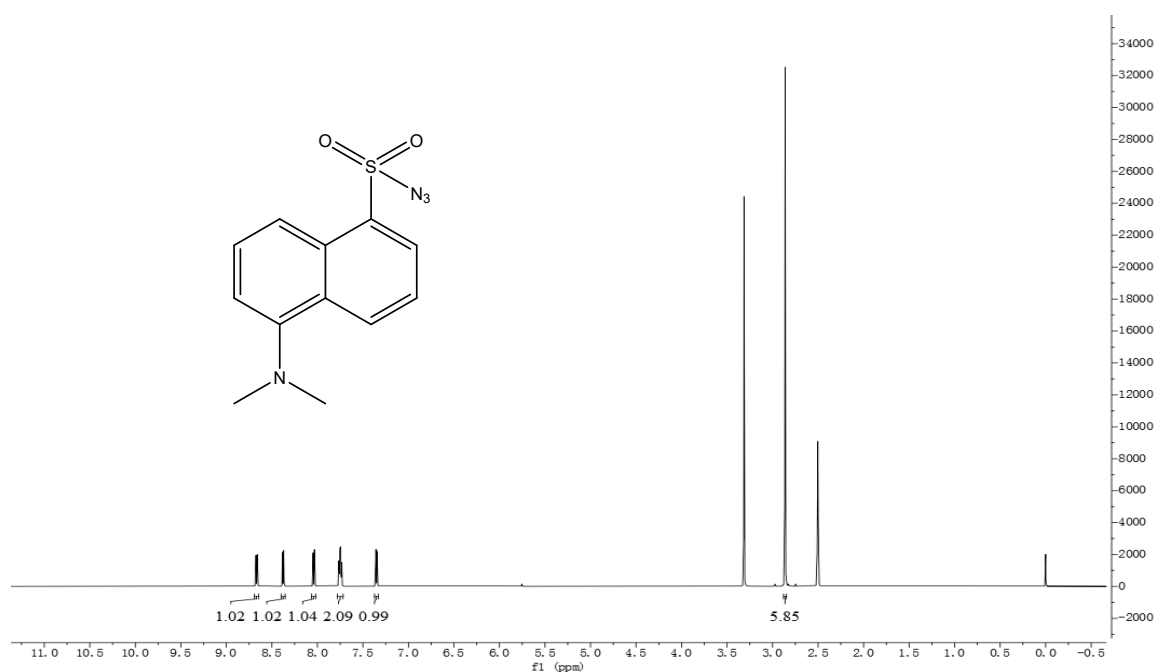

**Figure S1.** <sup>1</sup>H NMR spectrum of **DNS-Az**. <sup>1</sup>H NMR (600 MHz, DMSO-d<sub>6</sub>) δ 8.67 (dd, J = 8.5, 1.2 Hz, 1H), 8.38 (dd, J = 7.4, 1.3 Hz, 1H), 8.04 (dd, J = 8.7, 1.0 Hz, 1H), 7.75 (ddd, J = 8.5, 7.4, 4.2 Hz, 2H), 7.35 (d, J = 7.6 Hz, 1H), 2.86 (d, J = 2.0 Hz, 6H).

(V+) YP02: 1::5  
20221020-002 769 (4.610)

LCT Premier KE504

Ä-20 -R-ÖÄ 02: 1::5  
1: TOF MS ES+  
1.42e5

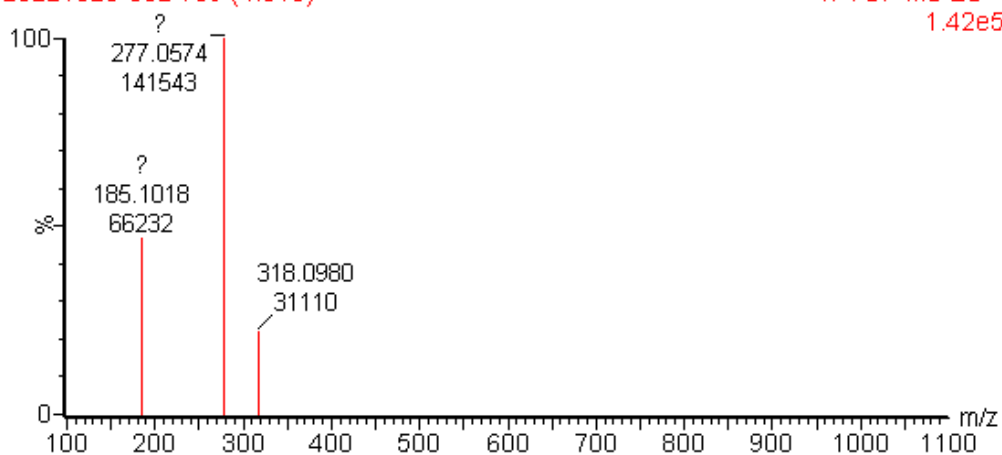

Figure S2. HRMS of DNS-Az. HRMS (ESI) Calcd for  $C_{12}H_{12}N_4O_2S[M+H]^+$  277; found 277.

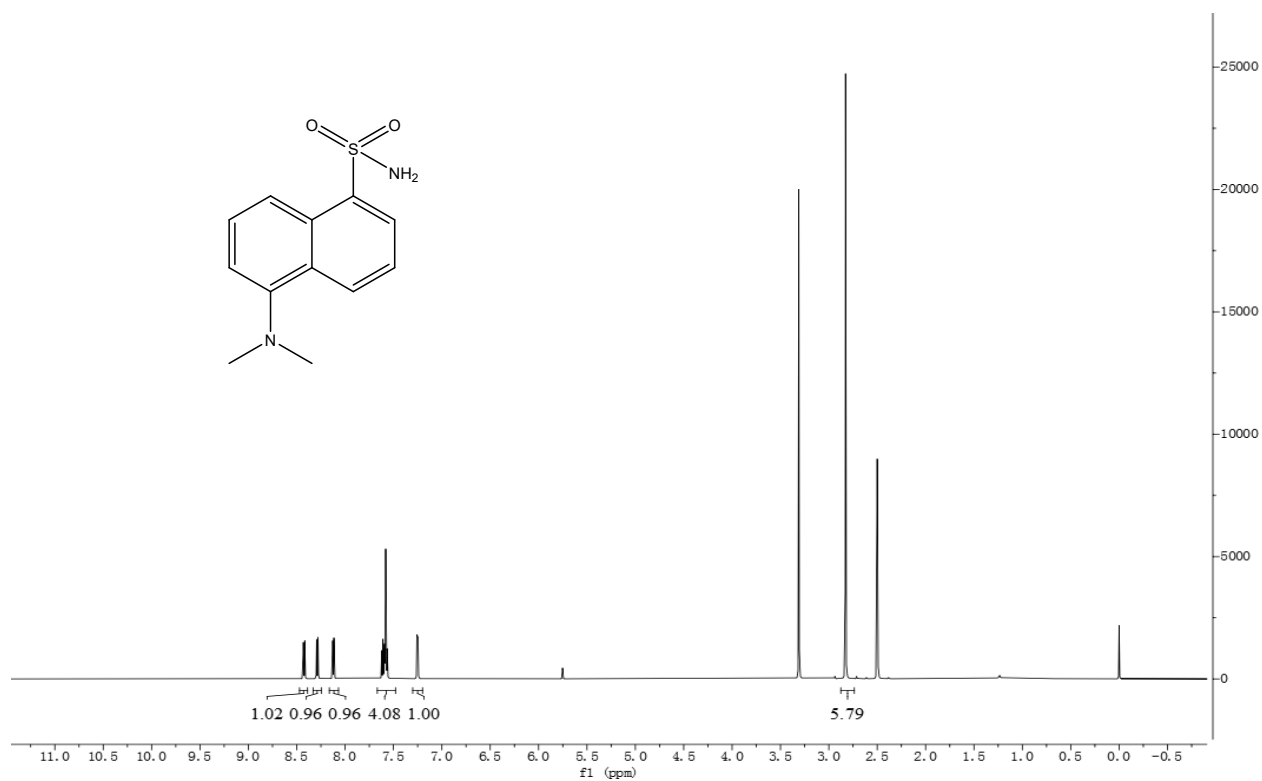

Figure S3.  $^1H$  NMR spectrum of DNS-NH<sub>2</sub>.  $^1H$  NMR (600 MHz, DMSO-d<sub>6</sub>)  $\delta$  8.42 (dt,  $J$  = 8.5, 1.1 Hz, 1H), 8.36 – 8.24 (m, 1H), 8.12 (dd,  $J$  = 7.3, 1.3 Hz, 1H), 7.68 – 7.45 (m, 4H), 7.31 – 7.20 (m, 1H), 2.83 (s, 6H).

(V+) an ji02: 1::3

LCT Premier KE504

Àù-22 -@ÔÂ 02: 1::3

20221022-02 633 (3.830)

1: TOF MS ES+

1.32e5

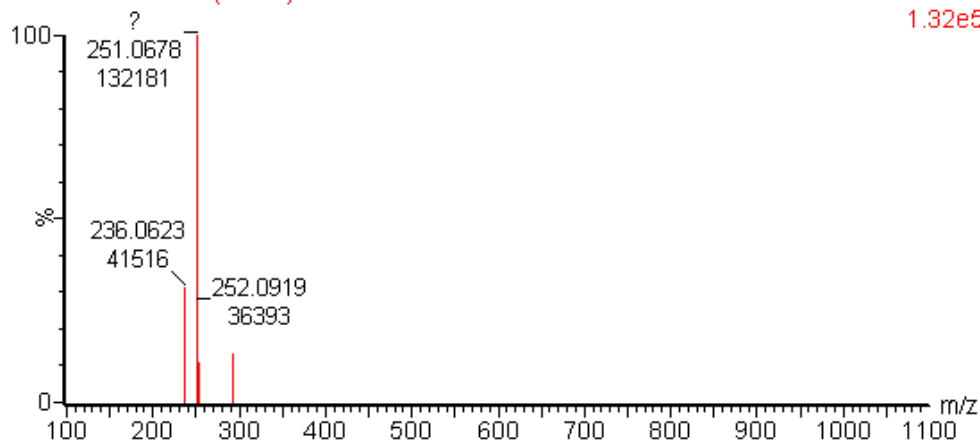

**Figure S4.** HRMS of **DNS-NH<sub>2</sub>**. HRMS (ESI) Calcd for  $C_{12}H_{14}N_2O_2S[M+H]^+$  251; found 251.

## 2.2 DNS-Az-M content detection

**DNS-Az** is prepared into 1 mg/mL solution with ethanol and diluted to 10, 20, 50, 100, 200, 400  $\mu\text{g/mL}$ , respectively. The different concentrations of **DNS-Az** solution was detected at 350 nm to draw a standard standard curve. **DNS-Az-M** solution 100  $\mu\text{L}$  was added methanol 500  $\mu\text{L}$ , and mixed to obtain demulsified solution, then the OD was detected at 350 nm. **DNS-Az-M** content was calculated according to standard curve of **DNS-Az**.

**Figure S5.** Standard curve of **DNS-Az**.

### 2.3 Study on protein removal by different proportion methanol

Plasma 100  $\mu\text{L}$  were added different proportion methanol (volume ratio of 1:1, 1:1.5, 1:2, 1:3, 1:4, 1:5), then the mixture was centrifuged at 12000 rpm for 10 minutes at 4°C. Supernatant (100  $\mu\text{L}$ ) was gently transferred into 96-well plate, and **DNS-Az-M** (0.4  $\mu\text{L}$ , final concentration 200  $\mu\text{M}$ ) was added. Fluorescence intensity was measured every 10 min.  $\lambda_{\text{ex}}=340\text{ nm}$ ,  $\lambda_{\text{em}}=535\text{ nm}$ .

**Figure S6.** Fluorescence intensity change in the reaction of **DNS-Az-M** with plasma without methanol treatment.

**Figure S7.** Fluorescence intensity change of reaction between **DNS-Az-M** and plasma after methanol treatment in different proportions.
